# Supplementary material for: Gut colonization by a novel Clostridium species is associated with the onset of epizootic rabbit enteropathy
Source: PubMed Central journal article supplement (PMC6302431; doi:10.1186/s13567-018-0617-8), 2018-12-20
Supplement: 13567_2018_617_MOESM6_ESM.pdf [file 13567_2018_617_MOESM6_ESM.pdf]

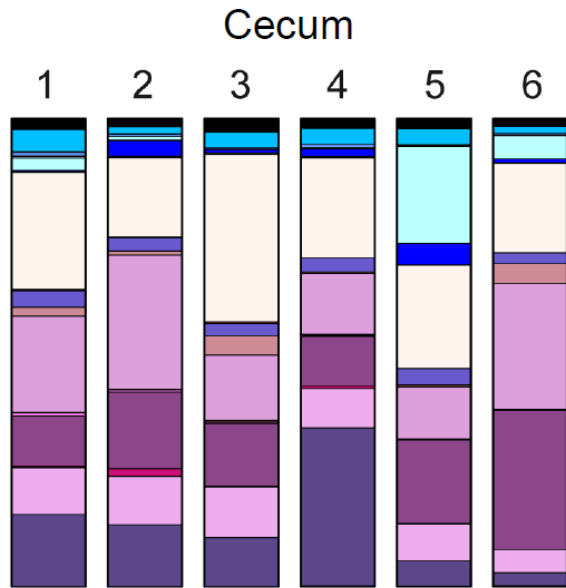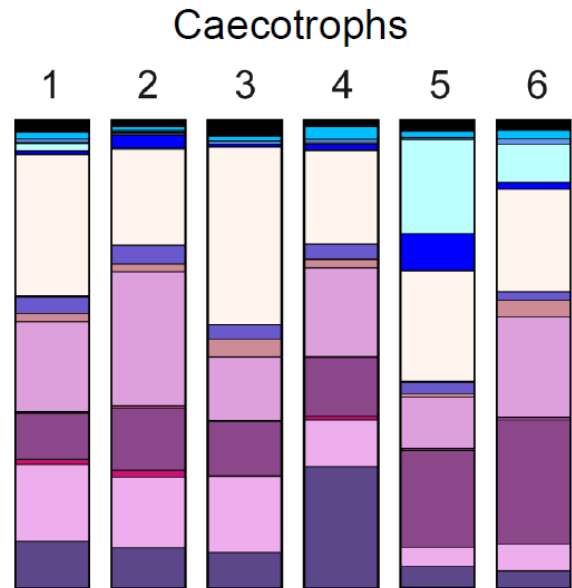

- Lysinibacillus
- Bacillus
- Robinsoniella
- Roseburia
- unclassified\_Lachnospiraceae
- Sporacetigenium
- Clostridium
- Sporobacter
- Subdoligranulum
- unclassified\_Ruminococcaceae
- Acetivibrio
- Oscillibacter
- unclassified\_Clostridiales
- unclassified\_Clostridia

- unclassified\_Firmicutes
- Campylobacter
- Akkermansia
- unclassified\_Bacteria
- Bacteroides
- Barnesiella
- unclassified\_Porphyrmonadaceae
- Parabacteroides
- Alistipes
- unclassified\_Rikenellaceae
- unclassified\_Bacteroidales
- unclassified\_Bacteroidetes
- Escherichia.Shigella
- Other\_bacteria
