# Supplementary material for: Gut colonization by a novel Clostridium species is associated with the onset of epizootic rabbit enteropathy
Source: PubMed Central journal article supplement (PMC6302431; doi:10.1186/s13567-018-0617-8), 2018-12-20

**A**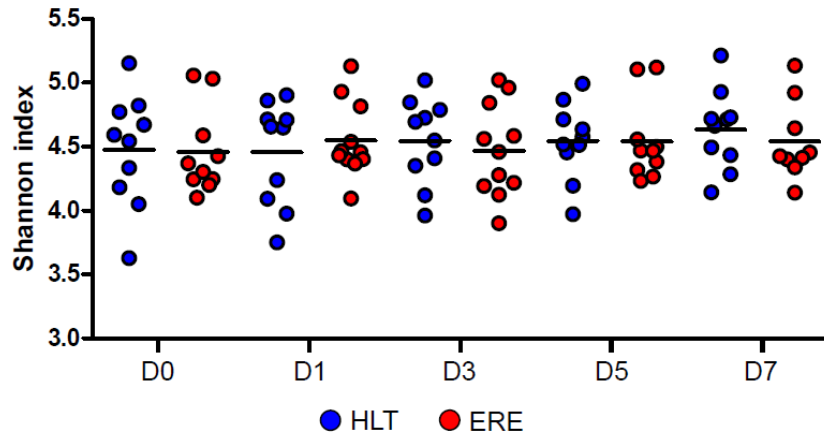**B**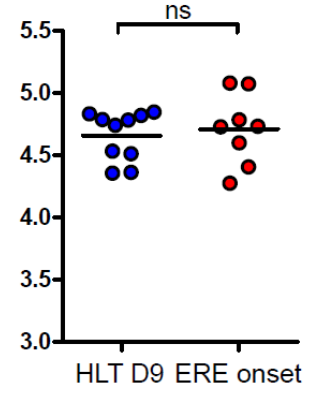

Supplement: 13567_2018_617_MOESM8_ESM.pdf [file 13567_2018_617_MOESM8_ESM.pdf]
