# Supplementary material for: Gut colonization by a novel Clostridium species is associated with the onset of epizootic rabbit enteropathy
Source: Springer Nature journal article supplement (doi:10.1186/s13567-018-0617-8), 2018-12-01

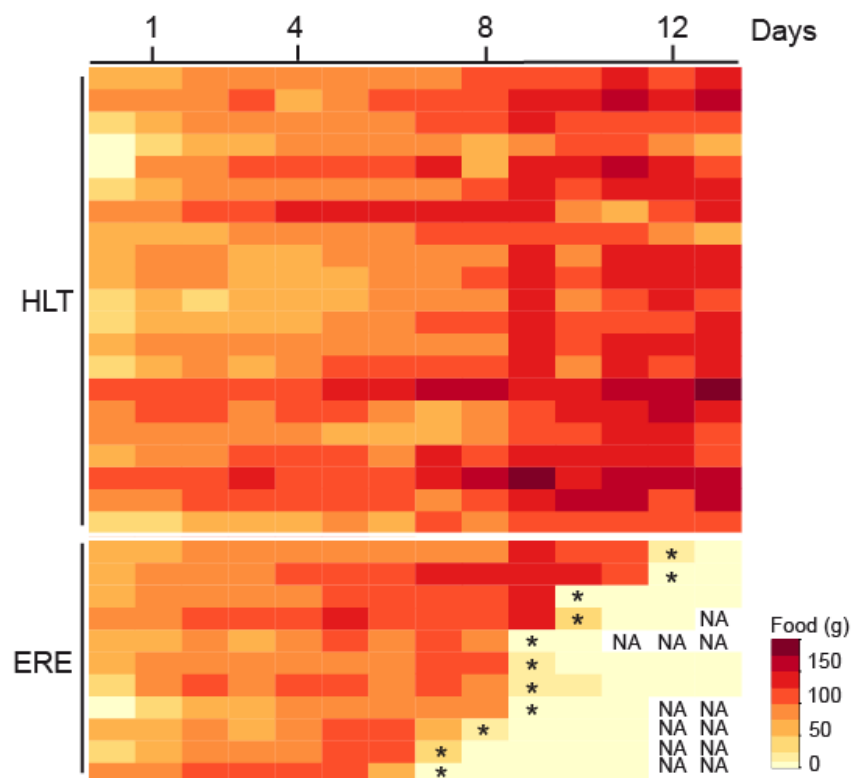

Supplement: MOESM3 [file 13567_2018_617_MOESM3_ESM.pdf › 13567_2018_617_MOESM3_ESM.pdf]
